# Supplementary material for: A Case Study in Citizen Science: The Effectiveness of a Trap-Neuter-Return Program in a Chicago Neighborhood
Source: Animals (Basel). 2018 Jan 18;8(1):14. doi: 10.3390/ani8010014 (PMC5789309; doi:10.3390/ani8010014)
Supplement: Supplementary file 1 [file animals-08-00014-s001.xlsx]

## Sheet: Sheet1
			Cats in My Yard 2007-2016 Colony Data Spreadsheet
Colony Name-Yr.Originated				Year 1 Colony Activity							Year 2 Colony Activity							Year 3 Colony Activity							Year 4 Colony Activity							Year 5 Colony Activity							Year 6 Colony Activity							Year 7 Colony Activity
		Initial Number of Cats	Sterilized	Previously S/N	Rescue/Adopt	Deaths/Disappearances	YE Colony Size		Colony Additions	Sterilized	Previously S/N	Rescue/Adopt	Deaths/Disappearances	YE Colony Size		Colony Additions	Sterilized	Previously S/N	Rescue/Adopt	Deaths/Disappearances	YE Colony Size		Colony Additions	Sterilized	Previously S/N	Rescue/Adopt	Deaths/Disappearances	YE Colony Size		Colony Additions	Sterilized	Previously S/N	Rescue/Adopt	Deaths/Disappearances	YE Colony Size		Colony Additions	Sterilized	Previously S/N	Rescue/Adopt	Deaths/Disappearances	YE Colony Size		Colony Additions	Sterilized	Previously S/N	Rescue/Adopt	Deaths/Disappearances	YE Colony Size
Bonita-2011		3	3	0	0	0	3		0	0	0	0	3	0		0	0	0	0	0	0		0	0	0	0	0	0		0	0	0	0	0	0		0	0	0	0	0	0
Eleanor Rigby-2008		4	4	0	0	0	4		12	12	0	5	3	8		0	0	0	0	1	7		0	0	0	0	0	7		1	0	0	3	1	4		1	1	0	1	2	2		0	0	0	1	0	1
Frontier-2009		8	8	0	0	0	8		0	0	0	1	0	7		0	0	0	0	0	7		3	3	0	3	1	6		0	0	0	1	3	2		0	0	0	0	0	2		0	0	0	0	0	2
Garage Band-2009		1	1	0	0	1	0		1	1	0	1	0	0		3	3	0	0	2	1		3	3	0	1	3	0		0	0	0	0	0	0		0	0	0	0	0	0		1	0	1	0	0	1
Ginger-2013		1	1	0	0	0	1		0	0	0	0	1	0		0	0	0	0	0	0		0	0	0	0	0	0
James Gang-2007		3	3	0	1	1	1		1	1	0	1	0	1		9	7	1	2	5	3		2	2	0	0	1	4		3	3	0	0	1	6		1	0	1	1	1	5		2	2	0	1	0	6
Jose & The Pussycats-2010		3	2	1	0	0	3		0	0	0	0	0	3		8	7	0	3	0	8		1	1	0	3	0	6		1	0	1	0	1	6		0	0	0	1	0	5		0	0	0	0	0	5
La Vida Lydia-2012		1	0	1	0	0	1		1	0	0	0	0	2		1	1	0	1	0	2		0	0	0	0	1	1		0	0	0	0	0	1
Little Sister-2010		4	1	0	4	0	0		4	4	0	0	1	3		3	3	0	0	0	6		0	0	0	0	0	6		0	0	0	0	0	6		0	0	0	0	0	6		0	0	0	0	0	6
Major Tomcat-2012		4	4	0	0	0	4		0	0	0	0	0	4		0	0	0	0	0	4		0	0	0	0	0	4		0	0	0	0	0	4
Marta Volta-2010		3	3	0	0	1	2		0	0	0	0	0	2		1	0	0	3	0	0		0	0	0	0	0	0		3	2	1	0	0	3		0	0	0	0	0	3		0	0	0	0	0	3
Martino Awesome-2009		2	2	0	2	0	0		5	4	1	0	0	5		0	0	0	0	0	5		0	0	0	0	5	0		0	0	0	0	0	0		0	0	0	0	0	0		0	0	0	0	0	0
Mother-2010		6	6	0	4	0	2		1	0	1	0	0	3		0	0	0	0	0	3		0	0	0	0	2	1		0	0	0	0	0	1		0	0	0	0	0	1		0	0	0	0	0	1
Peacock-2012		3	0	3	3	0	0		0	0	0	0	0	0		1	1	0	0	0	1		0	0	0	0	0	1		0	0	0	0	1	0														0
Ricky Martino-2010		6	6	0	0	0	6		0	0	0	0	0	6		0	0	0	0	0	6		0	0	0	0	0	6		0	0	0	0	0	6		0	0	0	0	6	0		0	0	0	0	0	0
Rockstar-2012		5	4	1	1	0	4		3	1	2	2	1	4		0	0	0	0	2	2		0	0	0	0	0	2		0	0	0	0	0	2
Stealers Wheel-2012		9	9	0	2	0	7		0	0	0	0	0	7		7	6	0	7	4	3		0	0	0	0	3	0		0	0	0	0	0	0
Stealth-2013		1	1	0	0	1	0		0	0	0	0	0	0		0	0	0	0	0	0		0	0	0	0	0	0
Thompson Twins-2012		1	1	0	0	0	1		2	2	0	0	0	3		2	2	0	0	0	5		0	0	0	0	1	4		0	0	0	0	1	3
V-2010		7	7	0	0	0	7		9	9	0	1	0	15		20	3	11	1	1	33		0	0	0	0	18	15		3	2	1	2	1	15		0	0	0	0	1	14		0	0	0	0	2	12
	Total:	75				Total:	54						Total:	73						Total:	96						Total:	63						Total:	59						Total:	38						Total:	37
Total number of cats trapped from 2007 to 2016 = 199 (includes 4 cats known to have migrated to new colony in program)
Total number of cats present at inception of colonies = 75
Total number of cats remaining YE 2015 = 44
Total number of cats rehomed (adoption/rescue) = 65 (26-adopted, 33-admitted to rescue, 3-RTO, 2-relocated, 1-seized by animal control)
Total number of cats died or disappeared = 86 (67-disappeared, 6-euthanized, 13-died other cause)
Total number of cats migrated to new colony = 4
